# Supplementary material for: The Relationship between Household Sanitation and Women’s Experience of Menstrual Hygiene: Findings from a Cross-Sectional Survey in Kaduna State, Nigeria
Source: Int J Environ Res Public Health. 2018 May 3;15(5):905. doi: 10.3390/ijerph15050905 (PMC5981944; doi:10.3390/ijerph15050905)
Supplement: Supplementary file 1 [file ijerph-15-00905-s001.zip › Supplementary materials/Supplementary Materials 1.pdf]

### Supplementary Materials 1.

Bivariate and multivariable relationships between household sanitation, hygiene, menstrual material, demographics and menstrual management location

|                                  | Main household facility<br>(n=962) |                  | Other sanitation facility<br>(n=337) |                  | Sleeping area<br>(n=521) |                  | Backyard/no facility<br>(n=174) |                   |
|----------------------------------|------------------------------------|------------------|--------------------------------------|------------------|--------------------------|------------------|---------------------------------|-------------------|
|                                  | OR (95%CI)                         | aOR (95%CI)      | OR (95%CI)                           | aOR (95%CI)      | OR (95%CI)               | aOR (95%CI)      | OR (95%CI)                      | aOR (95%CI)       |
| <b>Household sanitation</b>      |                                    |                  |                                      |                  |                          |                  |                                 |                   |
| Safely managed/basic             | 0.93 (0.71-1.23)                   | 1.76 (1.26-2.46) | 2.76 (1.81-4.22)                     | 1.22 (0.76-1.97) | 0.61 (0.44-0.85)         | 0.57 (0.39-0.82) | 0.63 (0.33-1.19)                | 0.38 (0.16-0.90)  |
| Limited                          | 0.72 (0.51-1.02)                   | 1.63 (1.08-2.48) | 4.29 (2.63-6.98)                     | 1.70 (0.97-2.98) | 0.67 (0.45-1.01)         | 0.59 (0.36-0.98) | 0.09 (0.02-0.37)                | 0.03 (0.00-0.21)  |
| Unimproved                       | 1.00                               | 1.00             | 1.00                                 | 1.00             | 1.00                     | 1.00             | 1.00                            | 1.00              |
| Open defecation                  | -                                  | -                | 1.57 (0.96-2.56)                     | 1.85 (1.09-3.15) | 3.68 (2.65-5.11)         | 3.56 (2.50-5.06) | 7.26 (4.61-11.44)               | 9.86 (5.76-16.87) |
| <b>Handwashing facility</b>      |                                    |                  |                                      |                  |                          |                  |                                 |                   |
| Yes                              | 1.18 (0.93-1.50)                   | 1.07 (0.79-1.45) | 1.91 (1.39-2.63)                     | 1.04 (0.71-1.52) | 0.58 (0.44-0.77)         | 0.84 (0.60-1.19) | 0.58 (0.35-0.93)                | 1.41 (0.84-2.38)  |
| No                               | 1.00                               | 1.00             | 1.00                                 | 1.00             | 1.00                     | 1.00             | 1.00                            | 1.00              |
| <b>Age</b>                       |                                    |                  |                                      |                  |                          |                  |                                 |                   |
| 15-19                            | 1.31 (1.04-1.65)                   | 2.18 (1.53-3.09) | 0.88 (0.66-1.17)                     | 0.48 (0.31-0.74) | 0.78 (0.59-1.03)         | 0.70 (0.49-1.01) | 0.95 (0.60-1.49)                | 0.70 (0.39-1.26)  |
| 20-24                            | 0.99 (0.75-1.29)                   | 1.45 (1.04-2.03) | 0.83 (0.58-1.18)                     | 0.59 (0.38-0.91) | 1.04 (0.76-1.41)         | 0.88 (0.62-1.25) | 1.32 (0.81-2.13)                | 0.91 (0.52-1.56)  |
| 25-34                            | 0.97 (0.76-1.25)                   | 1.22 (0.92-1.63) | 0.88 (0.64-1.21)                     | 0.76 (0.53-1.10) | 1.08 (0.82-1.42)         | 0.96 (0.71-1.29) | 1.15 (0.73-1.79)                | 0.84 (0.50-1.40)  |
| 35+                              | 1.00                               | 1.00             | 1.00                                 | 1.00             | 1.00                     | 1.00             | 1.00                            | 1.00              |
| <b>Education</b>                 |                                    |                  |                                      |                  |                          |                  |                                 |                   |
| None                             | 1.00                               | 1.00             | 1.00                                 | 1.00             | 1.00                     | 1.00             | 1.00                            | 1.00              |
| Primary school                   | 0.58 (0.45-0.75)                   | 0.82 (0.59-1.13) | 2.20 (1.43-3.41)                     | 1.59 (1.02-2.49) | 1.37 (1.04-1.80)         | 1.23 (0.91-1.67) | 1.06 (0.68-1.66)                | 0.69 (0.41-1.15)  |
| Secondary school                 | 0.45 (0.35-0.56)                   | 0.68 (0.47-0.99) | 5.12 (3.51-7.49)                     | 2.02 (1.28-3.20) | 0.98 (0.75-1.27)         | 1.15 (0.80-1.64) | 1.16 (0.77-1.73)                | 0.94 (0.53-1.64)  |
| Higher education                 | 0.62 (0.42-0.93)                   | 0.88 (0.54-1.42) | 9.96 (6.00-16.54)                    | 2.42 (1.37-4.27) | 0.42 (0.25-0.70)         | 0.78 (0.44-1.38) | 0.06 (0.01-0.44)                | 0.08 (0.01-0.66)  |
| <b>Marital status</b>            |                                    |                  |                                      |                  |                          |                  |                                 |                   |
| Married/cohabitating             | 1.00                               | 1.00             | 1.00                                 | 1.00             | 1.00                     | 1.00             | 1.00                            | 1.00              |
| Divorced/widowed                 | 0.90 (0.56-1.44)                   | 1.06 (0.61-1.85) | 1.50 (0.78-2.89)                     | 0.96 (0.43-2.12) | 1.05 (0.63-1.77)         | 1.12 (0.63-1.97) | 0.57 (0.20-1.58)                | 0.65 (0.24-1.76)  |
| Never married                    | 0.75 (0.60-0.95)                   | 0.72 (0.51-1.02) | 2.41 (1.84-3.15)                     | 1.64 (1.11-2.39) | 0.75 (0.57-0.98)         | 1.03 (0.70-1.50) | 0.84 (0.54-1.31)                | 1.01 (0.55-1.83)  |
| <b>Wealth</b>                    |                                    |                  |                                      |                  |                          |                  |                                 |                   |
| 1 (lowest)                       | 1.00                               | 1.00             | 1.00                                 | 1.00             | 1.00                     | 1.00             | 1.00                            | 1.00              |
| 2                                | 1.37 (0.94-2.01)                   | 1.44 (0.87-2.41) | 0.82 (0.36-1.87)                     | 0.71 (0.31-1.64) | 0.67 (0.45-1.01)         | 0.68 (0.44-1.04) | 1.16 (0.65-2.04)                | 1.38 (0.76-2.52)  |
| 3                                | 1.05 (0.72-1.54)                   | 1.12 (0.67-1.88) | 1.20 (0.53-2.67)                     | 0.84 (0.36-1.97) | 0.84 (0.57-1.26)         | 0.86 (0.56-1.31) | 1.13 (0.64-1.99)                | 1.23 (0.66-2.29)  |
| 4                                | 0.81 (0.56-1.18)                   | 0.49 (0.82-1.63) | 4.00 (1.93-8.29)                     | 2.24 (0.93-5.37) | 0.87 (0.58-1.28)         | 1.39 (0.87-2.21) | 0.34 (0.15-0.78)                | 0.64 (0.26-1.57)  |
| 5 (highest)                      | 0.97 (0.67-1.39)                   | 0.50 (0.27-0.95) | 6.48 (3.16-13.28)                    | 2.58 (0.91-7.32) | 0.35 (0.23-0.53)         | 0.81 (0.44-1.48) | 0.50 (0.27-0.92)                | 3.62 (1.52-8.64)  |
| <b>Rurality</b>                  |                                    |                  |                                      |                  |                          |                  |                                 |                   |
| Urban                            | 1.00                               | 1.00             | 1.00                                 | 1.00             | 1.00                     | 1.00             | 1.00                            | 1.00              |
| Rural                            | 0.81 (0.64-1.02)                   | 1.16 (0.82-1.63) | 0.41 (0.30-0.56)                     | 1.11 (0.69-1.76) | 1.78 (1.36-2.33)         | 0.72 (0.48-1.09) | 3.12 (1.91-5.11)                | 0.93 (0.47-1.86)  |
| <b>Reuse menstrual materials</b> |                                    |                  |                                      |                  |                          |                  |                                 |                   |
| Yes                              | 1.34 (1.07-1.67)                   | 1.30 (0.97-1.75) | 0.24 (0.18-0.32)                     | 0.46 (0.34-0.64) | 2.00 (1.55-2.60)         | 1.59 (1.16-2.18) | 1.26 (0.84-1.88)                | 0.75 (0.46-1.25)  |
| No                               | 1.00                               | 1.00             | 1.00                                 | 1.00             | 1.00                     | 1.00             | 1.00                            | 1.00              |

OR: bivariate odds ratio. 95%CI: 95% confidence interval. aOR: odds ratio for full multivariable model. - no observations and category excluded from analyses
